# Supplementary material for: Fly-DPI: database of protein interactomes for D. melanogaster in the approach of systems biology
Source: Springer Nature journal article supplement (doi:10.1186/1471-2105-7-s5-s18), 2006-12-01
Supplement: Additional file 4 [file 1471-2105-7-s5-s18-s4.doc]

Supplemental data S4:. Comparison with all dataset existed in BIND with Fly-DPI (high confidence).

|  | Number of protein interactions | Number of hit to Fly-DPI |
| --- | --- | --- |
| affinity-chromatography | 166 | 21 |
| Immunoprecipitation | 125 | 11 |
| three-dimensional-structure | 67 | 16 |
| Y2H (not include 3 core datasets) | 575 | 59 |
